# Supplementary material for: SUMO Conjugation to BZR1 Enables Brassinosteroid Signaling to Integrate Environmental Cues to Shape Plant Growth
Source: PubMed Central journal article supplement (PMC7181186; doi:10.1016/j.cub.2020.01.089), 2020-04-20
Supplement: mmc1.pdf [file mmc1.pdf]

**Current Biology, Volume 30**

**Supplemental Information**

**SUMO Conjugation to BZR1 Enables  
Brassinosteroid Signaling to Integrate  
Environmental Cues to Shape Plant Growth**

**Moumita Srivastava, Anjil K. Srivastava, Beatriz Orosa-Puente, Alberto  
Campanaro, Cunjin Zhang, and Ari Sadanandom**

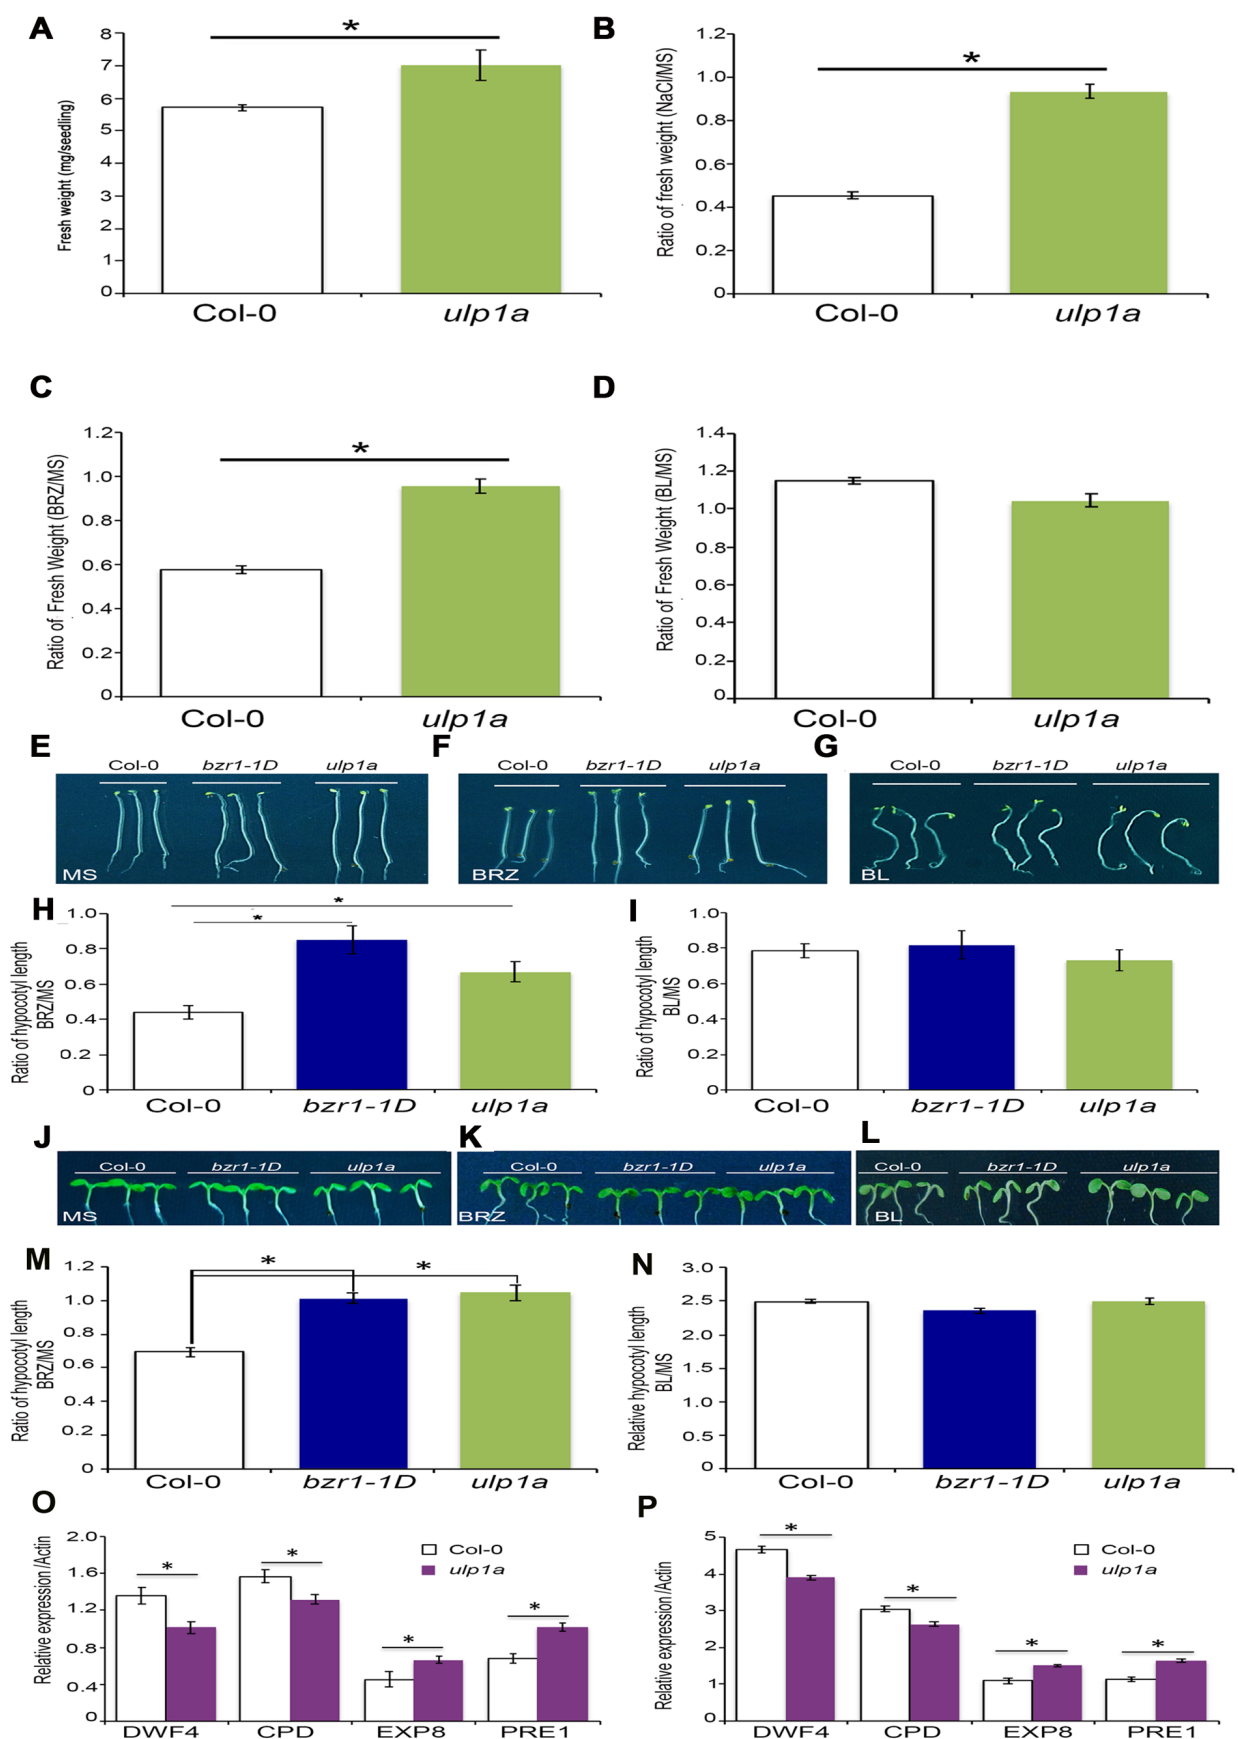

**Figure S1; ULP1a is the SUMO protease involved in BR signaling. Related to Figure 1.** (A) Quantification for fresh weight for Col-0 and *ulp1a* grown on MS for 12 days. (B-D) Quantification for relative fresh weight for 12d old Col-0 and *ulp1a* grown on BRZ (2 $\mu$ M) (B), BL(1 $\mu$ M) (C) and NaCl (100mM) with reference to untreated samples. *ulp1a* is less sensitive to BRZ mediated inhibition of seedling growth. (E-G) Representative image of 6d old seedlings of Col-0, *bZR1-1D* and *ulp1a* grown on  $\frac{1}{2}$  MS, BRZ (2 $\mu$ M) and BL(1 $\mu$ M) medium respectively in dark. (H-I). Quantification of relative root growth for 6d old seedlings treated with BRZ (2 $\mu$ M) (H) and BL(1 $\mu$ M) (I) in reference to untreated seedlings. (J-L). Representative image of 6d old seedlings of Col-0, *bZR1-1D* and *ulp1a* grown on  $\frac{1}{2}$  MS, BRZ (2 $\mu$ M) and BL(1 $\mu$ M) medium respectively in light. (M-N). Quantification of relative root growth for 6d old seedlings treated with BRZ (2 $\mu$ M) (M) and BL(1 $\mu$ M) (N) in reference to untreated seedlings. (O-P) qRT-PCR analysis for Brassinosteroid target genes in 10d old Col-0 and *ulp1a* seedlings in untreated (O) and BRZ treated (P) conditions.

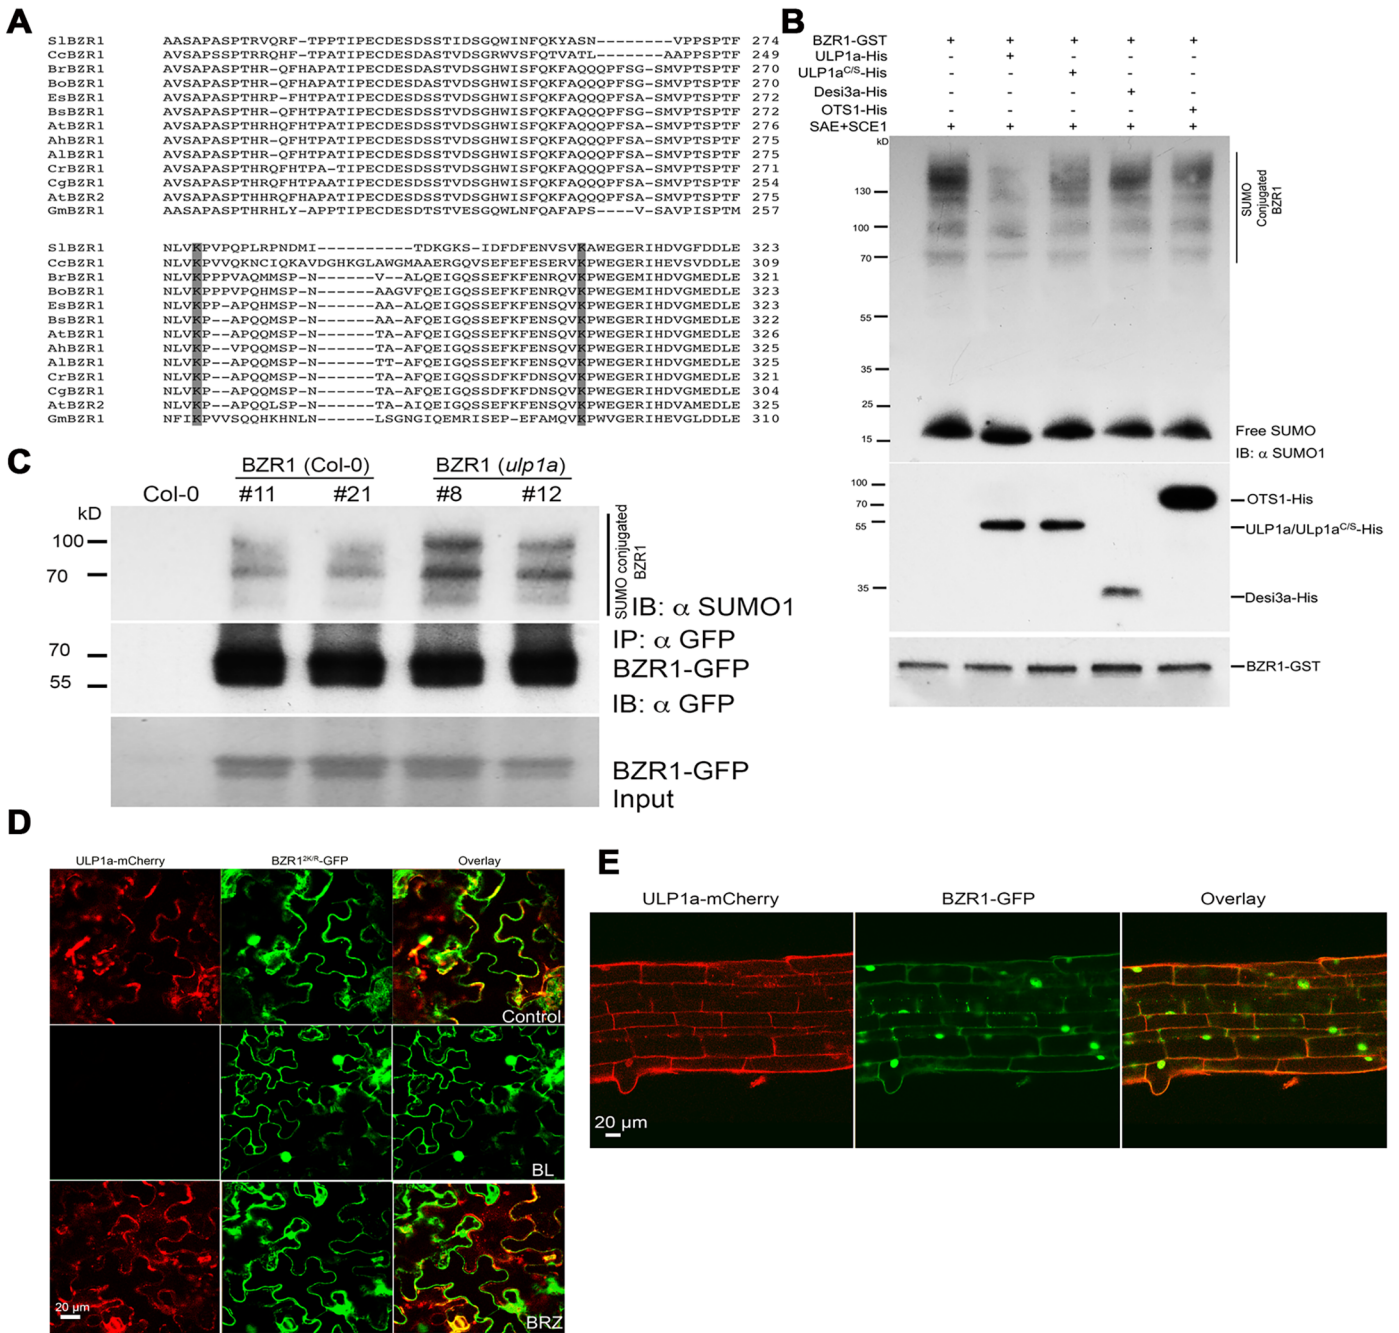

**Figure S2, SUMO sites for BZR1 are conserved in different plant species and is deSUMOylated by the SUMO protease ULP1a. Related to Figure 2;** (A) Amino acid alignment of BZR1 from *Arabidopsis thaliana* with *Solanum lycopersicum* (S1BZR1), *Cajanus cajan* (CcBZR1), *Brassica rapa* (BrBZR1), *Brassica oleracea* (BoBZR1), *Eutrema salsugineum* (EsBZR1), *Boechera stricta* (BsBZR1), *Arabidopsis halleri* (AhBZR1), *Arabidopsis lyrata* (AlBZR1), *Capsella rubella* (CrBZR1), *Capsella grandiflora* (CgBZR1), *Arabidopsis thaliana* (AtBZR2/BES1) and *Glycine max* (GmBZR1). The conserved lysine at the two positions are highlighted in grey. Phytozome (<http://phytozome.jgi.doe.gov/pz/portal.html>) was used to obtain the BZR1 homolog sequences for different plant species. (B) ULP1a specifically deSUMOylates BZR1. High molecular weight conjugates of His-SUMO1 modified GST tagged BZR1 were formed by incubating purified SUMO E1 (SAE1 and 2) and E2 (SCE1) with BZR1-GST in the presence His-ULP1a, His-ULP1a<sup>CS</sup>, His-OTS1 and His-Desi3a and subsequently immunoblotted with anti-SUMO1 ( $\alpha$ SUMO1) (upper panel) to detect SUMO chains, anti-His ( $\alpha$ His) (middle panel) to detect His-ULP1a, His-ULP1a<sup>CS</sup>, His-OTS1 and His-Desi3a and anti-GST ( $\alpha$  GST) to detect BZR1-GST (lower panel). (C) BZR1 gets hyperSUMOylated in *ulp1a* background. Immunoprecipitation (IP:  $\alpha$ GFP) experiments were carried out with anti-GFP beads from total protein derived from transgenic lines expressing *BZR1::BZR1-GFP* expressed in Col-0 or *BZR1::BZR1-GFP* expressed in *ulp1a* background. Immunoblots were probed with anti-GFP (IB:  $\alpha$ GFP) or anti- SUMO1/2 (IB:  $\alpha$ SUMO1) antibodies. (D) ULP1a colocalises with BZR1<sup>2KR</sup> in the cytoplasm. *N. benthamiana* leaves co-infiltrated with ULP1a-mCherry and BZR1<sup>2KR</sup>-GFP were analyzed for fluorescence after 3 days. Before imaging, the leaves were infiltrated with 1 $\mu$ M BL or 2 $\mu$ M BRZ and incubated for 1 hour to see the effect of the treatments. Images were obtained using confocal laser scanning microscope Carl Zeiss Airyscan 880. Scale bar= 20 $\mu$ m. (E) BZR1 and ULP1a co-localise in stable transgenic lines in *Arabidopsis*. Confocal images of transgenic *Arabidopsis* seedlings co-expressing *BZR1::BZR1-GFP* and 35S::ULP1a::mcherry.

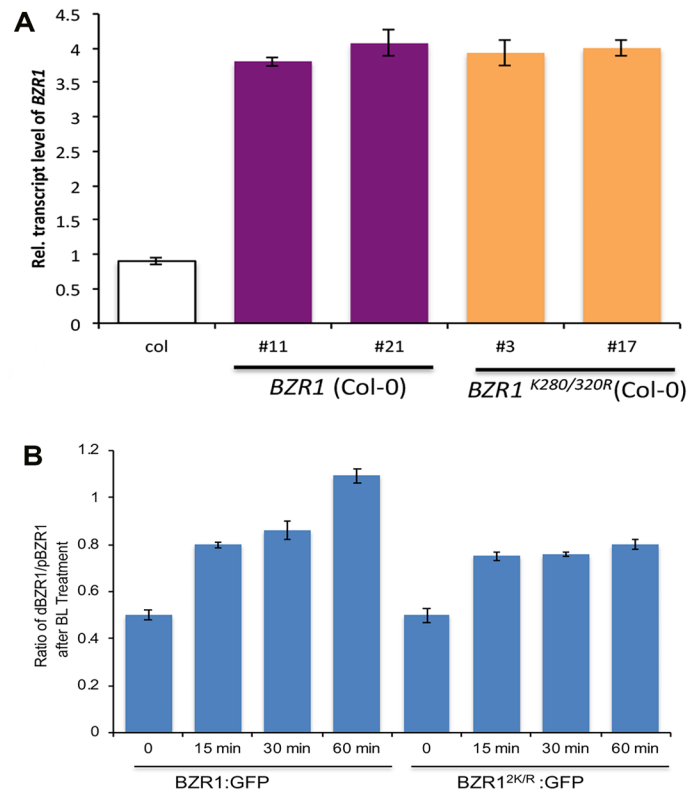

**Figure S3, *pro* BZR1::BZR1-GFP and *pro* BZR1::BZR1<sup>2KR</sup>-GFP have similar transcript levels but respond differently in response to the brassinosteroids. Related to Figure 3. (A) Expression analysis of BZR1 in different transgenic lines. The expression levels of BZR1 in Col-0 and different transgenic plants by real-time PCR analysis. The experiment was replicated three times and data shown mean  $\pm$  SD (N=3). (B) BL treatment does not affect the ratio of phosphorylated and dephosphorylated forms of BZR1 in *pro* BZR1::BZR1<sup>2KR</sup>-GFP. Ratio of the band intensities for dephosphorylated BZR1 to phosphorylated BZR1 for BZR1 (Col-0) and BZR1<sup>2KR</sup> (Col-0) when treated with BL at different time points (Figure 3E) quantified using image J software.**



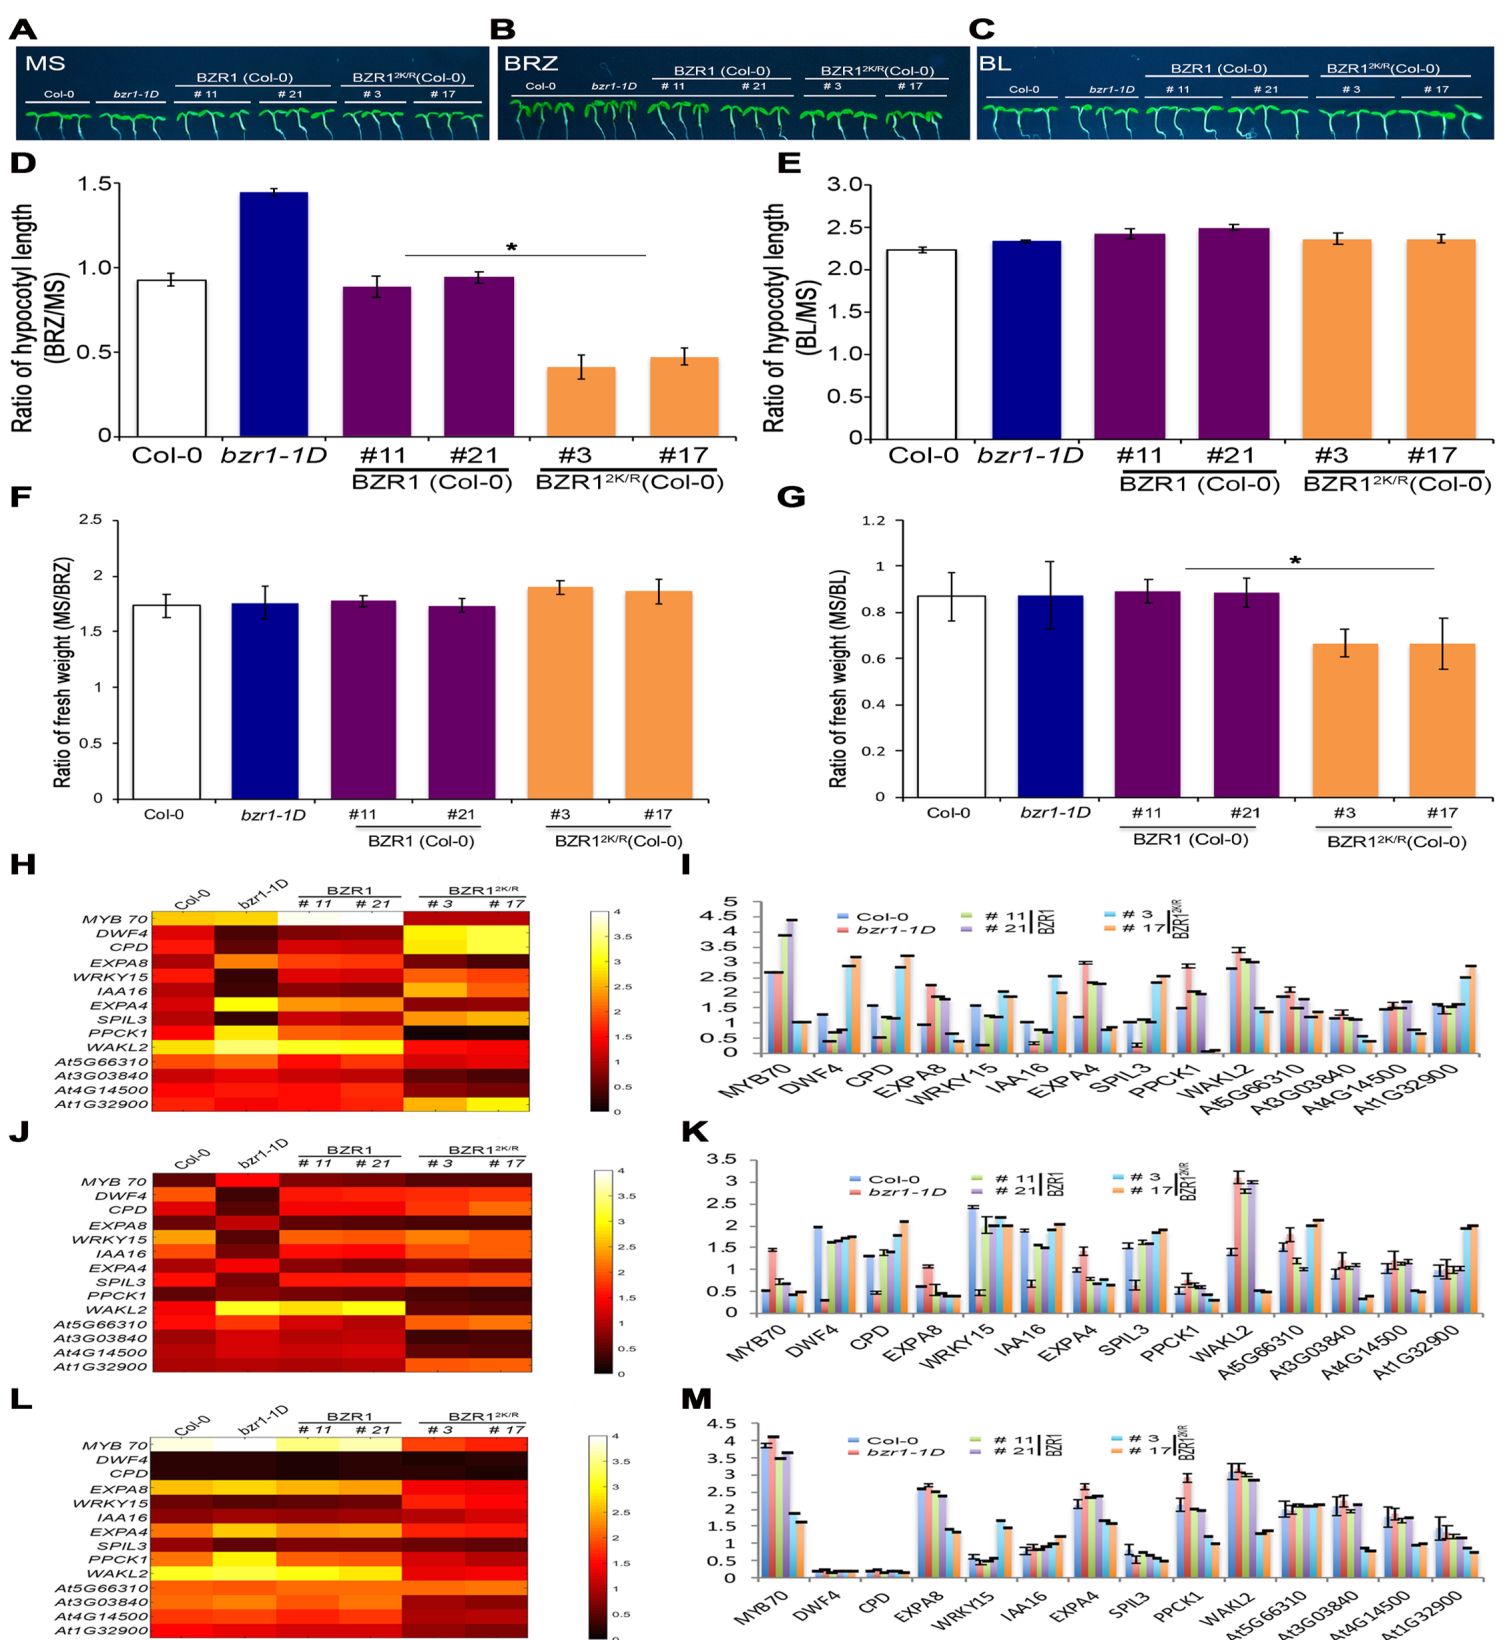

**Figure S4; SUMO deficient form of BZR1 is hypersensitive to BR deficiency. Related to Figure 4.** A-C. A-C Representative images of hypocotyl lengths of 6d old seedlings of Col-0, *bZR1-1D*, *pro* *BZR1::BZR1-GFP*, *pro* *BZR1::BZR1<sup>2K/R</sup>-GFP* grown on 1/2 MS, BRZ (2µM) and BL (1µM) medium respectively in light. D-E. Relative growth of hypocotyls for seedlings grown in BRZ (D) or BL (E) with reference to the untreated seedlings. F-G. Relative fresh weight for 10d old seedlings of Col-0, *bZR1-1D*, *pro* *BZR1::BZR1-GFP* and *pro* *BZR1::BZR1<sup>2K/R</sup>-GFP* grown on BRZ (2µM) (F) and BL (1µM) (G) medium with reference to untreated seedlings. H-M. SUMO mutant form of BZR1 fails to function as a transcription factor. Heat map and quantification of the BL target genes for which the expression was studied in Col-0, *bZR1-1D*, transgenic *pro* *BZR1::BZR1-GFP* and transgenic *pro* *BZR1::BZR1<sup>2K/R</sup>-GFP* transgenic lines without any treatment (H and I), on treatment with 2µM BRZ (J and K) and treated with 1µM BL (L and M). RNA was isolated from 10 day old seedlings treated with respective treatments for 5 hours and used for cDNA preparation. Real Time PCR analysis was done which confirmed a defective transcription factor activity for the SUMO deficient form of BZR1.

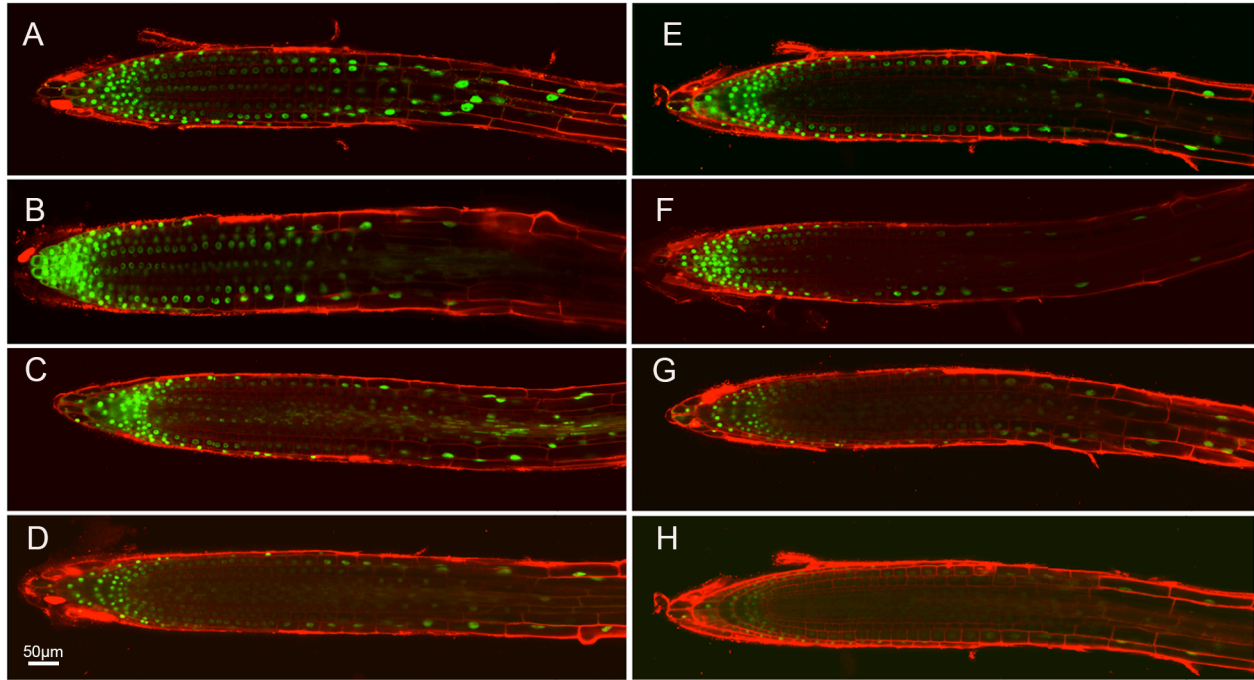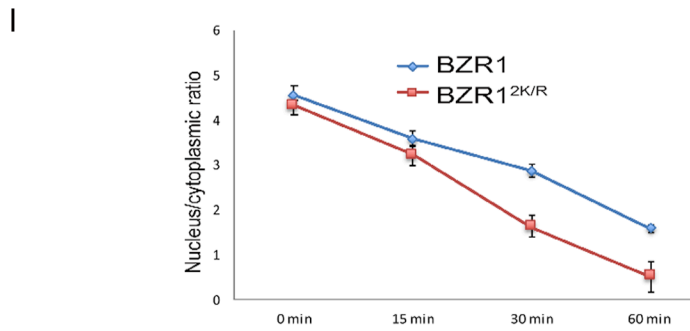

**Figure S5; BRZ causes rapid degradation of  $^{pro}$ BZR1::BZR1<sup>2K/R</sup>-GFP. Related to Figure 5.**  
 A-D. Confocal images of 4d old  $^{pro}$ BZR1::BZR1-GFP seedlings at 0, 15, 30 and 60 minutes of treatment with 2 $\mu$ M BRZ respectively. E-H. Confocal images of 4d old  $^{pro}$ BZR1::BZR1<sup>2K/R</sup>-GFP seedlings at 0, 15, 30 and 60 minutes of treatment with 2 $\mu$ M BRZ respectively. I N/C ratios of the GFP signals from the elongation zone of the roots at 0, 15, 30 and 60 min time points after treatment with 2 $\mu$ M BRZ.

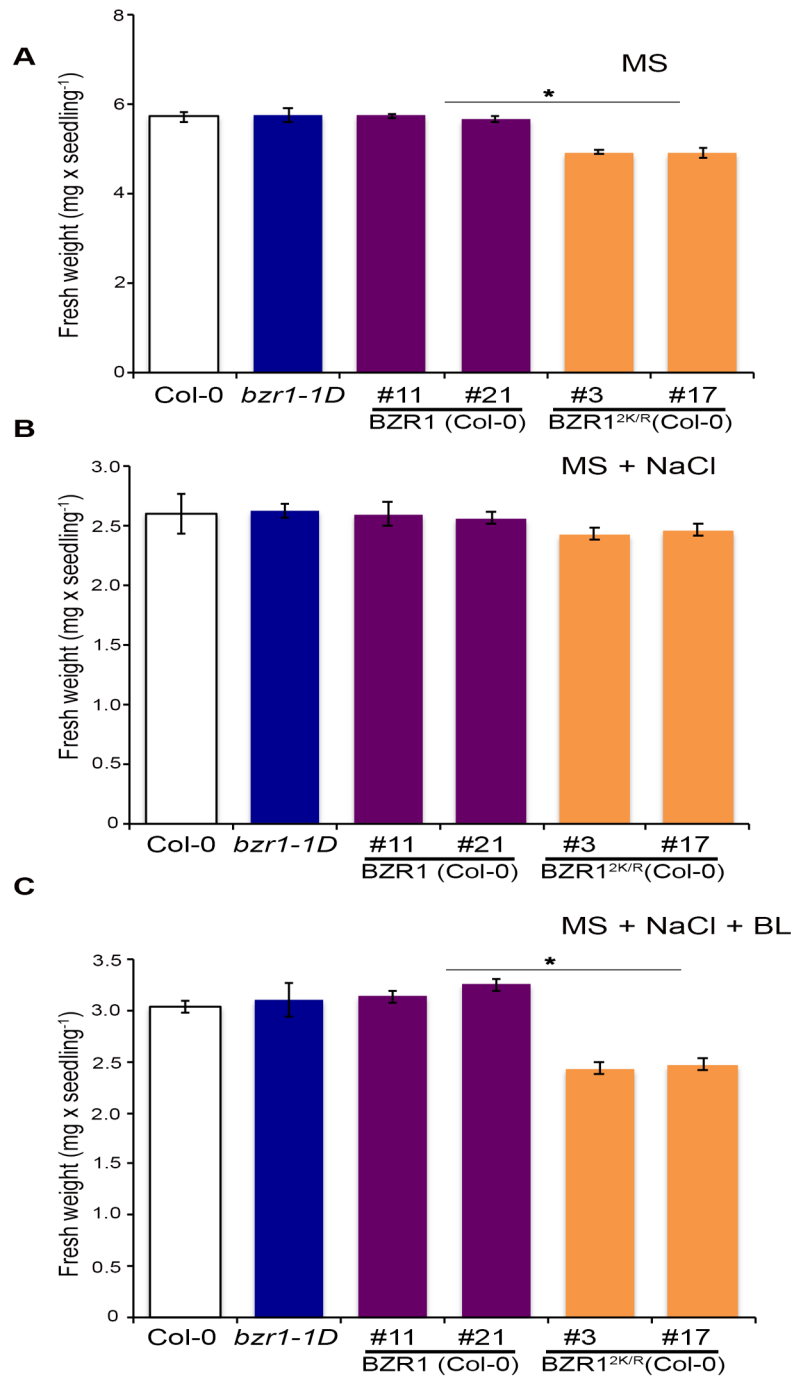

**Figure S6; Brassinosteroids cannot rescue the short root phenotype for *pro*BZR1::BZR1<sup>2KR</sup>-GFP seedlings. Related to Figure 7.** (A) Quantification of fresh weight measurements for 12d old Col-0, *bzr1-1D*, *pro*BZR1::BZR1-GFP and *pro*BZR1::BZR1<sup>2KR</sup>-GFP plants grown on MS. (B) Quantification of fresh weight measurements of 12d old Col-0, *bzr1-1D*, *pro*BZR1::BZR1-GFP and *pro*BZR1::BZR1<sup>2KR</sup>-GFP plants grown on 100mM NaCl. (C) Quantification of fresh weight measurements of 12d old Col-0, *bzr1-1D*, *pro*BZR1::BZR1-GFP and *pro*BZR1::BZR1<sup>2KR</sup>-GFP plants grown on 100mM NaCl for 6 days and then on 1μM BL for next 6 days.

| Genes                           | Forward primer                                        | Reverse primer                                        | Function                     |
|---------------------------------|-------------------------------------------------------|-------------------------------------------------------|------------------------------|
| <i>proBZR1</i>                  | 5'CACCGGTCTCAAGTAGCCTA<br>ATTCATCGAACCCCTCT 3'        | 5'TTTGGTCTCATCATCGGGAA<br>AACCAACAACCAA 3'            | Cloning                      |
| <i>BZR1</i>                     | 5'<br>CACCATGACTTCGGATGGAGC<br>TACG 3'                | 5' ACCACGAGCCTTCCCATTTC<br>3'                         | Cloning                      |
| <i>proBZR1::BZR1</i><br>overlap | 5'<br>CGTAGCTCCATCCGAAGTCAT<br>CGGGAAAACCAACAACCAA 3' | 5'<br>TTGGTTGTTGGTTTTCCCGAT<br>GACTTCGGATGGAGCTACG 3' | Cloning                      |
| <i>BZR1K280R</i>                | 5'<br>TCAATCTTGTGAGACCTGCGC<br>T 3'                   | 5'<br>AGGCGCAGGTCTCACAAAGATT<br>GA 3'                 | Site-directed<br>mutagenesis |
| <i>BZR1K320R</i>                | 5'<br>TCAAAGCTCTCAGTTTAAATTT<br>GAGAATAG 3'           | 5'<br>CTATTCTCAAATTTAAACTGAG<br>AGCTTTG 3'            | Site-directed<br>mutagenesis |
| <i>BZR1</i>                     | 5'<br>GTTACCCACCGGTCTCATC<br>3'                       | 5'<br>TGAAACTGGTGGCGATGTGT<br>3'                      | Genotyping                   |
| <i>BIN2</i>                     | CACCATGGCTGATGATAAGGA<br>GATG                         | AGTTCAGATTGATTCAAGAA<br>GCTT                          | Cloning                      |
| <i>ULP1a</i>                    | 5'<br>CACCATGAAAAACCAATCTAG<br>GG 3'                  | 5' CTCGGCTTTTCAGTTGCAGA 3'                            | Cloning                      |
| <i>SAUR8</i>                    | 5'<br>GGGACACTTCCCTGTCTACG<br>3'                      | 5'<br>GGAATGGTGAGACCCATGTCA<br>3'                     | Q-PCR                        |
| <i>ulp1a</i>                    | 5'<br>GCCTTTTCAGAAATGGATAAA<br>TAGCCTTGCTTCC 3'       | 5' CTCGGCTTTTCAGTTGCAGA 3'                            | genotyping                   |
| <i>SCE1</i>                     | 5' CACCATGGCTAGTG GAATC<br>3'                         | 5' TTA GACAAGAGCA GGATAC<br>3'                        | Cloning                      |
| <i>Actin</i>                    | 5' CCATCGCTCATCGGAATGGA<br>3'                         | 5'<br>TGGAACCACCACTGAGAACG<br>3'                      | Q-PCR                        |
| <i>ULP1a</i>                    | 5'<br>TGGTTACCACAAACGGAGCG<br>3'                      | 5' TGAAGTTGTCTCCGCAACGA<br>3'                         | Genotyping                   |
| <i>MYB70</i>                    | 5'<br>GGCGGAGGAAGATGATACGA<br>3'                      | 5' ACAACTCTGCCCTTCCTCTC<br>3'                         | Q-PCR                        |
| <i>DWF4</i>                     | 5'<br>GGTGGAAAGTGTACCAGTG<br>3'                       | 5' TCCTCCAAACGGCATGTAGT<br>3'                         | Q-PCR                        |
| <i>CPD</i>                      | 5' TCTCCCTCTCTTCTCCACCA<br>3'                         | 5'<br>GCGACAAGTAAAGCCACCAA<br>3'                      | Q-PCR                        |
| <i>EXPA8</i>                    | 5'GTTTTACGGCGGCGAAGATG<br>3'                          | 5'CCACCTCGGGTCATCGTTAC<br>3'                          | Q-PCR                        |
| <i>WRKY15</i>                   | 5'GGCGGAGGAAGATGATACG<br>A 3'                         | 5'<br>ACAAGTTGTCTCCGCAACGA<br>3'                      | Q-PCR                        |
| <i>IAA16</i>                    | 5'                                                    | 5'                                                    | Q-PCR                        |

|                  |                                  |                              |       |
|------------------|----------------------------------|------------------------------|-------|
|                  | TGCTTGTAGGAGACGTACCG3'           | CAACCGATCGAAACAGGCTT3'       |       |
| <i>EXPA4</i>     | 5'<br>AACTCCCTGAATCAGCCACA3'     | 5'<br>CCTTCGCCTTATCCGCAAAA3' | Q-PCR |
| <i>SPIL3</i>     | 5'<br>TGCTCCTCCATGCATGTTA3'      | 5'<br>TGGGCTTATACGGGCTTTGA3' | Q-PCR |
| <i>PPCK1</i>     | 5'<br>AGGAGTGTCTGGGCATGTAAA3'    | 5'<br>CATCGCCAAACTCAGAAGCA3' | Q-PCR |
| <i>WAKL2</i>     | 5'<br>AAGCTCCCGTAACTTCCTCC3'     | 5'<br>ATACCCGCCATAACAGCCTT3' | Q-PCR |
| <i>At5G66310</i> | 5'<br>GGCCATCTGATGCTTCTGTG3'     | 5'<br>TTGCTGCGTCCTTGAAACTC3' | Q-PCR |
| <i>At3G03840</i> | 5'<br>TTGCAGTGTACGTAGGGGAG3<br>, | 5'<br>TCTTCAGGACAAGGGATCGT3' | Q-PCR |
| <i>At4G14500</i> | 5'<br>GGCCTTCACTCTGGGATCAT3'     | 5'<br>AACCACATGCCCTTCTCAGA3' | Q-PCR |
| <i>At1G32900</i> | 5'<br>GCTGGTAAGATTGTGTGTGAG      | 5'<br>CACAAACAAGTGTCCCAAG    | Q-PCR |

**Table S1: List of primers used in the study, Related to STAR methods**



| Genes                          | Constructs                | Vectors | Experiment                         |
|--------------------------------|---------------------------|---------|------------------------------------|
| BZR1                           | BZR1:GFP                  | pEG103  | Co-IP/Confocal                     |
| BZR1 <sup>2K/R</sup>           | BZR1 <sup>2K/R</sup> :GFP | pEG103  | Co-IP/Confocal                     |
| proBZR1::BZR1                  | BZR1:GFP                  | pMDC107 | Generation of transgenics/Confocal |
| proBZR1 <sub>2K/R</sub> ::BZR1 | BZR1 <sup>2K/R</sup> :GFP | pMDC107 | Generation of transgenics/Confocal |
| BZR1                           | GST:BZR1                  | pDEST15 | In-vitro pull down assay           |
| BIN2                           | HA:BIN2                   | pEG201  | Co-IP                              |
| BIN2                           | His:BIN2                  | pDEST17 | In-vitro pull down assay           |
| ULP1a                          | HA:ULP1a                  | pEG201  | Co-IP                              |
| ULP1a                          | ULP1a:mcherry             | pMDC43  | Confocal                           |
| ULP1a                          | His:ULP1a                 | pDEST17 | In-vitro pull down assay           |
| ULP1a                          | HA:ULP1a                  | pGWB15  | Generation of transgenics          |
| SCE1(E2)                       | HA:SCE1                   | pEG201  | Co-IP                              |
| SUMO1                          | His:SUMO1                 | pDEST17 | Isopeptide cleaved SUMO chains     |

**Table S2: List of constructs used in the study, Related to STAR Methods**
